# Supplementary material for: The Goat (Capra hircus) Mammary Gland Mitochondrial Proteome: A Study on the Effect of Weight Loss Using Blue-Native PAGE and Two-Dimensional Gel Electrophoresis
Source: PLoS One. 2016 Mar 31;11(3):e0151599. doi: 10.1371/journal.pone.0151599 (PMC4816393; doi:10.1371/journal.pone.0151599)
Supplement: S2 Table — (XLSX) [file pone.0151599.s002.xlsx]

## Sheet: Folha1
Supplementary table S2: Protein identification by MALDI-TOF/TOF analysis.
Spot #	Mr1	pI1	protein name	protein score 2	gene identifier	accession number 3	species	Mr 4	ion score 5	peptide sequence 6
			2DE
1	76.8	8.5	lactoferrin	329	LTF	gi|88702503	Capra hircus	77.4	26	K.YYGYTGAFR.C
									45	R.FQLFGSPEGR.R
									30	K.SPQTHYYAVAVVK.K
									26	R.IPSKVDSALYLGSR.Y
									51	R.AAHVEQVLLHQQALFGK.N
2	77.7	8.1	aconitate hydratase, mitochondrial	119	ACO2	gi|556779462	Pantholops hodgsonii	85.4	34	K.SQFTITPGSEQIR.A
									43	R.NAITQEFGPVPDTAR.Y
3	63.4	8.7	apoptosis-inducing factor 1, mitochondrial isoform 2	111	AIFM2	gi|426257635	Ovis aries	66.5	57	K.VLPSAIVQSVGVSSGR.L
4	66.2	7.9	transketolase isoform 2	341	TKT	gi|426249393	Ovis aries	63.8	31	R.VLDPFTIKPLDKK.L
									53	R.TVPFCSTFAAFFTR.A
									102	K.ILATPPQEDAPSVDITNIR.M
5	52.8	8.5	ATP synthase subunit alpha, mitochondrial isoform X1	1140	ATP5A1	gi|548519195	Capra hircus	59.7	64	R.VLSIGDGIAR.V
									64	K.AVDSLVPIGR.G
									24	R.ISVREPMQTGIK.A
									73	K.GIRPAINVGLSVSR.V
									90	K.TSIAIDTIINQKR.F
									110	R.EAYPGDVFYLHSR.L
									122	R.ILGADTSVDLEETGR.V
									123	R.TGAIVDVPVGEELLGR.V
									106	K.FENAFLSHVISQHQTLLGK.I
									174	R.EVAAFAQFGSDLDAATQQLLSR.G
6	53.3	8.3	ATP synthase subunit alpha, mitochondrial	826	ATP5A	gi|345308300	Ornithorhynchus anatinus	59.9	40	R.VLSIGDGIAR.V
									60	K.AVDSLVPIGR.G
									79	K.HALIIYDDLSK.Q
									35	K.GIRPAINVGLSVSR.V
									56	K.TSIAIDTIINQKR.F
									24	K.LYCIYVAIGQKR.S
									92	R.EAYPGDVFYLHSR.L
									96	R.ILGADTSVDLEETGR.V
									110	R.TGAIVDVPVGEELLGR.V
									115	R.EVAAFAQFGSDLDAATQQLLSR.G
7	51.3	8.2	NADH dehydrogenase [ubiquinone] flavoprotein 1, mitochondrial	262	NDUFV1	gi|556743207	Pantholops hodgsonii	48.8	26	R.GGAWFASFGR.E
					Parte inferior do formulário				31	R.HFRPELEER.M
									53	K.KTSFGSLKDEDR.I
									78	R.GEFYNEASNLQVAIR.E
8	53.7	7.8	glutamate dehydrogenase 1, mitochondrial-like	679	GLUD1	gi|548526368	Capra hircus	54.6	57	K.NLNHVSYGR.L
									50	R.DDGSWEVIEGYR.A
									111	K.HGGTIPIVPTAEFQDR.I
									51	R.GASIVEDKLVEDLKTR.E
									73	R.IIKPCNHVLSLSFPIR.R
									58	K.ELEDFKLQHGTILGFPK.A
									100	K.IIAEGANGPTTPEADKIFLER.N
9	53.7	7.8	ATP synthase subunit alpha, mitochondrial isoform X1	469	ATP5A1	gi|548519195	Capra hircus	59.7	23	R.VLSIGDGIAR.V
									34	K.AVDSLVPIGR.G
									20	K.GIRPAINVGLSVSR.V R.EAYPGDVFYLHSR.L
									78	R.ILGADTSVDLEETGR.V
									49	R.TGAIVDVPVGEELLGR.V
									77	R.EVAAFAQFGSDLDAATQQLLSR.G
									51
10	53.4	7.9	sorting and assembly machinery component 50 homolog	174	SAMM50	gi|478527681	Ceratotherium simum	52.3	31	R.FYLGGPTSVR.G
									35	K.VTFQFSYGTK.E
									39	R.ICDGVQFGAGIR.F
									22	K.ETSYGLSFFKPQPGNFDR.N
11	49.5	9.3	elongation factor 1-alpha 1-like	344	EEF1A1	gi|555986330	Bos mutus	50.1	63	K.IGGIGTVPVGR.VK.GSFKYAWVLDK.L
									26	K.GSFKYAWVLDK.L
									114	K.THINIVVIGHVDSGK.S
									33	R.YEEIVKEVSTYIK.K
									30	R.YEEIVKEVSTYIKK.I
12	46.2	8.2	cytochrome b-c1 complex subunit 2, mitochondrial	452	UQCRC2	gi|548520135	Capra hircus	48.3	58	K.QVAEQFLNIR.G
									49	R.NALANSLYCPDYR.I
									74	R.LPNGLVIASLENYAPASR.I
									53	K.ATAAPAGVPQHPQDLEFTR.L
									78	K.VTPDELHDYVQNHFTSAR.M
									61	K.AVAFQNPQAHVIENLHAAAYR.N
13	45.2	8	citrate synthase, mitochondrial	124	CS	gi|507977213	Condylura cristata	47.4	24	R.ALGFPLERPK.S
									29	R.ALGVLAQLIWSR.A
									53	K.GLVYETSVLDPDEGIR.F
14	41.4	7.9	mitochondrial import receptor subunit TOM40 homolog	274	TOMM40	gi|556723532	Pantholops hodgsonii	43.3	22	K.FVNWQVDGEYR.G
									95	K.ASDQLQVGVEFEASTR.M
									66	K.LPPLPLTLALGAFLNHR.K
									31	K.KLPPLPLTLALGAFLNHR.K
15	32.6	8	voltage-dependent anion-selective channel protein 2 isoform X1	489	VDAC2	gi|529010677	Bos taurus	35.1	29	K.LTLSALVDGK.S
									66	K.YQLDPTASISAK.V
									51	K.LTFDTTFSPNTGK.K
									69	K.LTFDTTFSPNTGKK.S
									111	K.VNNSSLIGVGYTQTLRPGVK.L
									76	R.TGDFQLHTNVNDGTEFGGSIYQK.V
16	29.7	8.1	D-beta-hydroxybutyrate dehydrogenase, mitochondrial	709	BDH1	gi|426217666	Ovis aries	38.7	33	K.YFDEKVAR.M
									61	R.YEMHPLGVK.V
									76	K.SEEVDKAAEVIR.S
									98	K.AVTHALTAATPYTR.Y
									28	R.MQIMTHFPGAISDR.I
									115	K.AVLITGCDSGFGFSLAK.H
									146	K.VSVVEPGNFIAATSLYGGTER.I
									57	R.TVQLNVCKSEEVDKAAEVIR.S
17	31.3	9.3	Chain G, F1-Atpase From Bovine Heart Mitochondria	425	ATP5C	gi|145579797	Bos taurus	30.3	62	K.HLIIGVSSDR.G
									109	R.VYGVGSLALYEK.A
									78	R.THSDQFLVTFK.E
									24	K.NASEMIDKLTLTFNR.T
									57	R.NYQEYSLANIIYYSLK.E
18	30.8	8.7	alpha-S2-casein precursor	393	CSN1S2	gi|550822248	Capra hircus		60	R.NAGPFTPTVNR.E
									74	R.NANEEEYSIR.S
									67	K.ALNEINQFYQK.F
									35	R.SSSEESAEVAPEEIK.I
19	30.4	7.7	alpha-S2-casein precursor	226	CSN1S2	gi|550822248	Capra hircus	26.5	38	R.NAGPFTPTVNR.E
									43	R.NANEEEYSIR.S
									42	K.ALNEINQFYQK.F
20	21.8	8.7	succinate dehydrogenase [ubiquinone] iron-sulfur subunit, mitochondrial	356	SDHB	gi|555988458		32.5	49	K.LQDPFSLYR.C
									60	K.EQYLQSIEDR.E
									25	K.IYPLPHMYVIK.D
									29	K.YLGPAVLMQAYR.W
									72	K.IKNEIDSTLTFR.R
									37	K.DLVPDLSNFYAQYK.S
21	20	8.7	coiled-coil-helix-coiled-coil-helix domain-containing protein 3, mitochondrial	142	CHCHD3	gi|548463957	Bos mutus	26.4	27	K.ELDAEKAFANEQLTR.A
22	18.8	7.9	cytochrome b-c1 complex subunit Rieske, mitochondrial-like	93	UQCRFS1	gi|548502597	Capra hircus	25.3	32	R.KGFSYLITATTTVGVAYAAK.N
									29	K.EIDQEAAVEVSQLRDPQHDLER.V
23	14.8	8.8	peroxiredoxin-1 isoformX5	239	PRDX1	gi|311259408	Sus scrofa	22.1	43	R.LVQAFQFTDK.H
									34	R.QITINDLPVGR.S
									86	R.GLFIIDDKGILR.Q
									34	R.TIAQDYGVLKADEGISFR.G
24	89	7.7	elongation factor 2	153	EEF2	gi|335282386	Sus scrofa	96.3	41	M.VNFTVDQIR.A
									30	K.EDLYLKPIQR.T
									20	R.CLYASVLTAQPR.L
									30	K.KEDLYLKPIQR.T
25	71.2	7.3	prelamin-A/C	733	LMNA	gi|556759719	Pantholops hodgsonii	74.4	24	R.LADALQELR.A
									58	R.SLETENAGLR.L
									25	K.VREEFKELK.A
									24	K.LRDLEDSLAR.E
									25	R.LKDLEALLNSK.E
									82	R.SVGGSGGGSFGDSLVTR.S
									84	R.VAVEEVDEEGKFVR.L
									62	R.LQEKEDLQELNDR.L
									57	R.IRIDSLSAQLSQLQK.Q
									70	R.NSNLVGAAHEELQQSR.I
26	69	7.3	prelamin-A/C isoform 1	594	LMNA	gi|472366893	Odobenus rosmarus	74.4	33	R.LADALQELR.A
									45	R.SLETENAGLR.L
									31	K.AAYEAELGDAR.K
									27	K.VREEFKELK.A
									28	K.LRDLEDSLAR.E
									27	K.LLEGEEERLR.L
									69	R.VAVEEVDEEGKFVR.L
									34	R.LQEKEDLQELNDR.L
									54	R.IRIDSLSAQLSQLQK.Q
									77	R.NSNLVGAAHEELQQSR.I
27	68.5	7	prelamin-A/C	121	LMNA	gi|556759719	Pantholops hodgsonii	74.4	26	R.VAVEEVDEEGKFVR.L
									28	R.IRIDSLSAQLSQLQK.Q
28	68.1	6.7	glycerol-3-phosphate dehydrogenase, mitochondrial	243	GUT2	gi|555989225	Bos mutus	81.7	28	K.GFITIVDVQR.V
									24	K.CVINATGPFTDTVR.K
									51	R.CKDVLTGEEFDVR.A
									43	R.LAFLNVQAAEEALPR.I
29	67.4	5.9	succinate dehydrogenase [ubiquinone] flavoprotein subunit, mitochondrial isoform X1	459	SDHA	gi|528998523	Bos taurus	74	34	K.ISSLYGDLR.H
									66	R.NTVIATGGYGR.T
									50	R.GEGGILINSQGER.F
									68	R.TGHSLLHTLYGR.S
									109	R.LGANSLLDLVVFGR.A
									45	R.GVIALCIEDGSIHR.I
									27	K.VSDAISAQYPVVDHEFDAVVVGAGGAGLR.A
30	62.8	7.4	prelamin-A/C	576	LMNA	gi|560891942	Canis familiaris	74.5	35	R.LADALQELR.A
									36	R.SLETENAGLR.L
									46	K.AAYEAELGDAR.K
									67	R.VAVEEVDEEGKFVR.L
									35	R.LQEKEDLQELNDR.L
									48	R.IRIDSLSAQLSQLQK.Q
									119	R.NSNLVGAAHEELQQSR.I
31	63.1	7.1	prelamin-A/C isoform 2	379	LMNA	gi|344286896	Loxodonta africana	70.9	24	R.SLETENAGLR.L
									23	K.AAYEAELGDAR.K
									20	K.LLEGEEERLR.L
									53	R.VAVEEVDEEGKFVR.L
									27	R.LQEKEDLQELNDR.L
									53	R.NSNLVGAAHEELQQSR.I
32	64.5	7	prelamin-A/C isoform 2	278	LMNA	gi|472366895	Odobenus rosmarus	70.9	47	R.VAVEEVDEEGKFVR.L
									36	R.NSNLVGAAHEELQQSR.I
33	65	6.8	prelamin-A/C isoform X1	970	LMNA	gi|504154249	Ochotona princeps	74.3	60	R.SLETENAGLR.L
									66	K.AAYEAELGDAR.K
									39	K.VREEFKELK.A
									29	K.LLEGEEERLR.L
									30	K.AAYEAELGDARK.T
									98	R.VAVEEVDEEGKFVR.L
									95	R.LQEKEDLQELNDR.L
									92	R.IRIDSLSAQLSQLQK.Q
									120	R.NSNLVGAAHEELQQSR.I
34	62	6.8	prelamin-A/C isoform 1	350	LMNA	gi|344286894	Loxodonta africana	74.5	29	R.LADALQELR.A
									33	R.SLETENAGLR.L
									57	K.AAYEAELGDAR.K
									52	R.VAVEEVDEEGKFVR.L
									25	R.LQEKEDLQELNDR.L
									20	R.IRIDSLSAQLSQLQK.Q
35	61.4	7.4	electron transfer flavoprotein-ubiquinone oxidoreductase, mitochondrial	158	ETFDH	gi|426247111	Ovis aries	69.4	45	R.ITTHYTVYPR.D
									26	K.TIGLDVTEYEDNLKK.S
36	60.7	7.2	EH domain-containing protein 1	298	EHD1	gi|62751751	Bos taurus	60.7	41	K.LLPLEEHYR.F
									35	K.LNAFGNAFLNR.F
									31	R.EHQISPGDFPNLR.K
									24	K.LLDTVDDMLANDIAR.L
37	57.1	7.2	dihydrolipoyl dehydrogenase, mitochondrial isoform 2	283	DLD	gi|426227595	Ovis aries	52.2	45	K.ALTGGIAHLFK.Q
									22	K.VGKFPFAANSR.A
									32	R.VCHAHPTLSEAFR.E
									50	K.SEEQLKEEGIEYK.V
									38	K.ALLNNSHFYHLAHGK.D
38	46.7	6.9	elongation factor Tu, mitochondrial	542	TUFM	gi|556735218	Pantholops hodgsonii	49.7	31	K.VEAQVYILSK.E
									42	K.YEEIDNAPEER.A
									33	R.QIGVEHVVVYVNK.A
									56	K.KYEEIDNAPEER.A
									66	K.LLDAVDTYIPVPTR.D
									36	K.SLDRAEAGDNLGALVR.G
									88	R.GITINAAHVEYSTAAR.H
									78	R.DLEKPFLLPVESVYSIPGR.G
39	48.7	6.7	elongation factor 1-gamma	326	EEF1G	gi|548527699	Capra hircus	50.7	28	K.AKDPFAHLPK.S
									50	R.ILGLLDAHLK.T
									53	R.EEKPKPQAER.K
									60	K.STFVLDEFKR.K
									61	K.ALIAAQYSGAQVR.V
40	46.6	5.8	NADH dehydrogenase [ubiquinone] iron-sulfur protein 2, mitochondrial	349	NDUFS2	gi|548456191	Capra hircus	47.4	37	K.LLNIQPPPR.A
									90	K.APGFAHLAGLDK.M
									39	K.TYLQALPYFDR.L
									79	K.TQPYDVYDQVEFDVPIGSR.G
41	37.7	6.6	annexin A1	602	ANXA1	gi|548476715	Capra hircus	39.2	24	R.VYREELKR.D
									61	K.TPAQFDAEELR.A
									92	K.GTDVNVFTTILTTR.S
									89	K.GVDEATIIEILTKR.N
									115	K.GLGTDEDTLNEILASR.T
									40	R.SEELAVNDDLADSDAR.A
42	36	7.1	Annexin A2	524	ANXA2	gi|440899105	Bos mutus	39.3	25	K.AYTNFDAER.D
									41	K.SLYYYIQQDTK.G
									30	R.SNEQRQDIAFAYQR.R
									57	R.QDIAFAYQR.R
									56	R.TNQELQEINR.V
									96	K.GVDEVTIVNILTNR.S
									48	K.GLGTDEDSLIEIICSR.T
									30	K.AYTNFDAERDALNIETAIK.T
43	36	7.1	annexin A2	705	ANXA2	gi|27807289	Bos taurus	38.9	34	K.AYTNFDAER.D
									75	R.TNQELQEINR.V
									43	K.SLYYYIQQDTK.G
									97	K.GVDEVTIVNILTNR.S
									62	R.SNEQRQDIAFAYQR.R
									106	K.GLGTDEDSLIEIICSR.T
									54	K.SLYYYIQQDTKGDYQK.A
									67	K.AYTNFDAERDALNIETAIK.T
44	28.4	6.7	cytochrome c1, heme protein, mitochondrial	125	CYC1	gi|84000289	Bos taurus	35.6	28	R.GLLSSLDHTSIR.R
									42	R.AANNGALPPDLSYIVR.A
									23	K.LSDYFPKPYPNPEAAR.A
45	29.7	7.2	cytochrome c1, heme protein, mitochondrial-like	108	CYC1	gi|548492072	Capra hircus	31.9	34	R.AANNGALPPDLSYIVR.A
									41	K.LSDYFPKPYPNPEAAR.A
46	18	6.5	heat shock protein beta-1 isoform X1	252	HSPB1	gi|529007450	Bos taurus	22.4	80	R.LFDQAFGLPR.L
									36	R.VSLDVNHFAPEELTVK.T
									85	K.SATQSAEITIPVTFQAR.A
47	15.3	6.1	C-reactive protein-like isoform X3	166	CRP	gi|548456711	Capra hircus	24.8	56	R.SYSIFSYATR.Q
									84	K.EASIILGQEQDAFAGGFDR.N
48	18.6	5.4	heat shock protein beta-1 isoform X1	254	HSPB1	gi|529007450	Bos taurus	22.4	80	R.LFDQAFGLPR.L
									62	R.VSLDVNHFAPEELTVK.T
									83	K.SATQSAEITIPVTFQAR.A
49	66.8	5.5	ALB protein	383	ALB	gi|74267962	Bos taurus	71.2	44	-.DTHKSEIAHR.F
									32	K.HLVDEPQNLIK.Q
									42	R.RHPEYAVSVLLR.L
									26	K.LGEYGFQNALIVR.Y
									86	K.DAFLGSFLYEYSR.R
									54	R.KVPQVSTPTLVEVSR.S
50	66.8	5.5	Chain A, BSA	287	ALB	gi|367460260	Bos taurus	68.4	24	R.RHPEYAVSVLLR.L
									36	K.LGEYGFQNALIVR.Y
									67	K.DAFLGSFLYEYSR.R
									65	R.KVPQVSTPTLVEVSR.S
51	67.3	4.9	Full=Serum albumin	147	ALB	gi|1351907	Bos taurus	71.2	24	R.RHPEYAVSVLLR.L
									27	K.LGEYGFQNALIVR.Y
									24	K.DAFLGSFLYEYSR.R
									20	R.KVPQVSTPTLVEVSR.S
52	70.1	4.9	stress-70 protein, mitochondrial	185	HSPA9	gi|426229624	Ovis aries	73.9	24	K.DAGQISGLNVLR.V
									25	R.AQFEGIVTDLIR.R
									24	K.LLGQFTLIGIPPAPR.G
									36	K.NAVITVPAYFNDSQR.Q
53	81	5.4	gelsolin	161	GSN	gi|555954800	Bos mutus	82.4	24	M.VVEHPEFLK.A
									49	K.HVVPNEVVVQR.L
									28	R.EVQGFESATFLGYFK.S
54	78.9	5.7	mitochondrial inner membrane protein isoform X5	189	IMMT	gi|548486094	Capra hircus	83.2	30	K.FVNQLKGESR.R
									35	K.VVSQYHELVVQAR.D
									20	K.TASADLPTVPLGSAVEAIR.A
55	79.1	5.6	mitochondrial inner membrane protein isoform X5	534	IMMT	gi|548486094	Capra hircus	83.2	46	R.GVYSEETLR.V
									43	K.LAEQELQFR.R
									48	R.ERPPEEVAAR.L
									62	K.FVNQLKGESR.R
									84	K.VVSQYHELVVQAR.D
									71	R.GIEQAVQSHAVAEEEAR.K
									60	K.TASADLPTVPLGSAVEAIR.A
56	98.2	5.5	collagen alpha-2(VI) chain	94	COL6A2	gi|556776837	Pantholops hodgsonii	101.6	28	R.VALLQFGGPR.E
									21	R.YGGLHFSDLVEVFSPPGSDR.A
57	73.3	4.7	NADH-ubiquinone oxidoreductase 75 kDa subunit, mitochondrial isoform X1	421	NDUFS1	gi|548454597	Capra hircus	80.4	21	R.YDHLGDSPK.I
									55	R.FEAPLFNAR.I
									38	K.SATYVNTEGR.A
									33	K.VALIGSPVDLTYR.Y
									35	R.NRLEEVSPNLVR.Y
									99	R.FASEIAGVDDLGTTGR.G
									33	R.IASQVAALDLGYKPGVEAIR.K
58	73.3	4.5	NADH-ubiquinone oxidoreductase 75 kDa subunit, mitochondrial isoform X1	529	NDUFS1	gi|548454597	Capra hircus	80.4	52	R.FEAPLFNAR.I
									45	K.SATYVNTEGR.A
									65	K.VALIGSPVDLTYR.Y
									117	R.FASEIAGVDDLGTTGR.G
									63	R.IASQVAALDLGYKPGVEAIR.K
									38	R.ALSEIAGMTLPYDTLDQVR.N
59	66.7	5.3	NADH-ubiquinone oxidoreductase 75 kDa subunit, mitochondrial isoform X1	529	NDUFS1	gi|548454597	Capra hircus	80.4	46	K.SATYVNTEGR.A
									34	R.ALSEIAGMTLPYDTLDQVR.N
									57	R.FEAPLFNAR.I
									63	K.VALIGSPVDLTYR.Y
									107	R.FASEIAGVDDLGTTGR.G
									69	R.IASQVAALDLGYKPGVEAIR.K
60	69.2	4.4	Hsc70	517	HSPA8	gi|78101017	Bos taurus	61	58	K.DAGTIAGLNVLR.I
									25	R.FEELNADLFR.G
									97	R.TTPSYVAFTDTER.L
									29	K.LLQDFFNGKELNK.S
									53	K.STAGDTHLGGEDFDNR.M
									45	R.IINEPTAAAIAYGLDKK.V
									63	K.TVTNAVVTVPAYFNDSQR.Q
61	67.4	4.4	lamin-B2	411	LMNB2	gi|444741701	Bos taurus	70.7	36	R.EGELTVAQGR.V
									22	R.VRDLESVFHR.S
									21	K.TLYEAELADARR.V
									50	R.ALELENDRLQLK.I
									28	R.LYRLELEQTYQAK.L
62	99.3	4.1	collagen alpha-1(VI) chain	288	COL6A2	gi|548452361	Capra hircus	10.9	22	R.LKPYGALVDK.V
									70	R.AGVEIFAVVVGR.Q
									52	K.AAEYDVAFGER.H
									46	R.LSIIATDHTYR.R
									45	K.VFSVAITPDHLEPR.L
63	100.9	4	collagen alpha-1(VI) chain	328	COL6A2	gi|548452361	Capra hircus	10.9	31	R.LKPYGALVDK.V
									72	R.AGVEIFAVVVGR.Q
									51	K.AAEYDVAFGER.H
									23	R.LSIIATDHTYR.R
									42	K.VFSVAITPDHLEPR.L
									22	K.GLEELLVGGSHLKENK.Y
									34	R.VAVVQYSGTGQQRPER.A
									38	R.VPSYQALLQGVFYQTVSR.K
64	82.4	4	ribosome-binding protein 1	518	RRBP1	gi|548489935	Capra hircus	103.4	44	R.EQEITAVQAR.M
									34	R.VSAAEEELRESR.V
									35	R.TEALLGDEQTRR.Q
									63	R.GLHGQLDEAR.A
									71	R.TLQEQLENGPSAQLAR.L
									74	R.SIEALLEASQAQDAQASR.V
									48	R.CTSALGSSEVEEAAQLKER.L
65	80.8	3.7	heat shock protein 90 beta	287	HSP90AB1	gi|12082134	Equus caballus	82.3	39	K.IDIIPNPQER.T
									59	K.HFSVEGQLEFR.A
									67	R.GVVDSEDLPLNISR.E
									32	K.VILHLKEDQTEYLEER.R
66	73.2	3.8	78 kDa glucose-regulated protein	1350	HSPA5	gi|426223038	Ovis aries	72.5	47	K.VYEGERPLTK.D
									55	R.AKFEELNMDLFR.S
									98	K.KSDIDEIVLVGGSTR.I
									70	R.IDTRNELESYAYSLK.N
									124	R.IINEPTAAAIAYGLDKR.E
									109	K.NQLTSNPENTVFDAKR.L
									161	K.VTHAVVTVPAYFNDAQR.Q
									147	K.DNHLLGTFDLTGIPPAPR.G
									134	R.IEIESFYEGEDFSETLTR.A
									148	K.VLEDSDLKKSDIDEIVLVGGSTR.I
67	68.1	3.9	TPA: lamin B1	359	LMNB1	gi|296485609	Bos taurus	62.2	33	R.AGGPATPLSPTR.L
									28	K.ALYETELADAR.R
									24	K.LREYEAALNSK.D
									24	K.ALYETELADARR.A
									44	R.IQELEDLLAKER.D
									24	K.LYKEELEQTYHAK.L
									36	K.FKAEHDQLLLNYAK.K
68	86.6	3.5	endoplasmin	658	HSP90B1	gi|548466863	Capra hircus	92.2	50	R.GLFDEYGSK.K
									39	K.LGVIEDHSNR.T
									54	K.FAFQAEVNR.M
									54	K.EAESSPFVER.L
									70	K.SILFVPTSAPR.G
									34	K.SEKFAFQAEVNR.M
									109	K.GVVDSDDLPLNVSR.E
									73	R.ELISNASDALDKIR.L
69	61.2	4.3	60 kDa heat shock protein, mitochondrial isoform X1	983	HSPD1	gi|548454369	Capra hircus	61.9	56	R.TVIIEQSWGSPK.V
									74	R.GYISPYFINTSK.G
									100	K.VGGTSDVEVNEKKDR.V
									64	K.VGEVIVTKDDAMLLK.G
									92	R.AAVEEGIVLGGGCALLR.C
									97	K.ISSVQSIVPALEIANAHR.K
									96	R.KPLVIIAEDVDGEALSTLVLNR.L
									153	K.LVQDVANNTNEEAGDGTTTATVLAR.S
70	57.8	3.9	tubulin alpha-1B chain isoform 2	931	TUBA1B	gi|297691739	Pongo abelii	46.8	67	R.LDHKFDLMYAK.R
									84	R.LISQIVSSITASLR.F
									129	R.AVFVDLEPTVIDEVR.T
									34	R.NLDIERPTYTNLNR.L
									114	R.IHFPLATYAPVISAEK.A
									35	K.VGINYQPPTVVPGGDLAK.V
									107	R.GHYTIGKEIIDLVLDR.I
									81	K.TIGGGDDSFNTFFSETGAGK.H
									128	R.QLFHPEQLITGKEDAANNYAR.G
71	56.1	3.7	tubulin, beta 4B class IVb	607	TUBB4B	gi|562870774	Tupaia chinensis	47.3	62	R.YLTVAAVFR.G
									64	R.FPGQLNADLR.K
									37	K.LAVNMVPFPR.L
									27	R.ISEQFTAMFR.R
									51	R.FPGQLNADLRK.L
									88	R.INVYYNEATGGK.Y
									31	R.AVLVDLEPGTMDSVR.S
									41	R.LHFFMPGFAPLTSR.G
									55	K.GHYTEGAELVDSVLDVVRK.E
72	52.5	3.7	Chain D, bovine F1-C8 Sub-Complex Of Atp Synthase	1200	ATP5B	gi|306991567	Bos taurus	50.3	138	K.AHGGYSVFAGVGER.T
									74	R.VALTGLTVAEYFR.D
									73	K.VALVYGQMNEPPGAR.A
									137	R.LVLEVAQHLGESTVR.T
									124	R.IMDPNIVGSEHYDVAR.G
									150	R.DQEGQDVLLFIDNIFR.F
									86	K.VLDSGAPIRIPVGPETLGR.I
									132	R.AIAELGIYPAVDPLDSTSR.I
									117	R.FLSQPFQVAEVFTGHLGK.L
									40	R.IPSAVGYQPTLATDMGTMQER.I
73	53.2	3.6	Chain D, Bovine F1-C8 Sub-Complex Of Atp Synthase	817	ATP5B	gi|306991567	Bos taurus	50.3	132	K.AHGGYSVFAGVGER.T
									59	R.VALTGLTVAEYFR.D
									44	K.TVLIMELINNVAK.A
									27	K.VALVYGQMNEPPGAR.A
									97	R.LVLEVAQHLGESTVR.T
									82	R.DQEGQDVLLFIDNIFR.F
									48	K.VLDSGAPIRIPVGPETLGR.I
									104	R.AIAELGIYPAVDPLDSTSR.I
									80	R.FLSQPFQVAEVFTGHLGK.L
74	49.7	4.2	thioredoxin domain-containing protein 5	133	TXNDC5	gi|426251394	Ovis aries	65.6	34	R.GYPTLLLFR.G
									30	K.FFKPGQEAVK.Y
									43	R.NFDEAVAEGVTFVK.F
75	51.2	4.6	cytochrome b-c1 complex subunit 1, mitochondrial-like	679	UQCRC1	gi|548515658	Capra hircus	51.3	50	R.EHTAYYIK.A
									59	R.ADLTEYLNR.H
									41	R.RIPLAEWESR.I
									60	K.EVESMGAHLNAYTTR.E
									118	R.NALVSHLDGTTPVCEDIGR.S
									106	K.HFSGLSGTYDEDAVPTLTPCR.F
									76	K.AVELLADIVQNCSLEDSQIEKER.D
76	51.2	4.4	cytochrome b-c1 complex subunit 1, mitochondrial-like	121	UQCRC1	gi|548515658	Capra hircus	51.3	28	R.EHTAYYIK.A
									37	R.ADLTEYLNR.H
77	55.9	5.6	cytosol aminopeptidase	84	LAP3	gi|548470463	Capra hircus	60	21	K.GITFDSGGISIK.A
78	60.2	5.8	protein disulfide-isomerase A3 precursor	619	PDIA3	gi|251823897	Ovis aries	57.4	43	K.YGVSGYPTLK.I
									25	K.FVMQEEFSR.D
									76	R.DGEESGAYDGPR.T
									42	R.GFPTIYFSPANK.K
									44	R.ELSDFISYLKR.E
									35	R.GFPTIYFSPANKK.Q
									81	R.FLEDYFDGNLKR.Y
									61	K.MDATANDVPSPYEVR.G
									54	K.TFSHELSDFGLESTTGEIPVVAVR.T
79	60.4	5.6	protein disulfide-isomerase A3	177	PDIA3	gi|556721331	Pantholops hodgsonii	52.3	25	R.GFPTIYFSPANK.K
									21	R.ELSDFISYLKR.E
									35	R.FLEDYFDGNLKR.Y
80	45.4	4.2	actin, cytoplasmic 2	751	ACTB	gi|471367241	Trichechus manatus	42.1	36	K.IKIIAPPER.K
									49	R.GYSFTTTAER.E
									50	R.AVFPSIVGRPR.H
									73	K.DSYVGDEAQSKR.G
									97	K.QEYDESGPSIVHR.K
									52	R.LDLAGRDLTDYLMK.I
									113	K.SYELPDGQVITIGNER.F
									108	R.VAPEEHPVLLTEAPLNPK.A
									36	K.DLYANTVLSGGTTMYPGIADR.M
81	45.2	4.1	actin, alpha cardiac muscle 1	709	ACTC	gi|4885049	Homo sapiens	42.3	49	R.GYSFVTTAER.E
									57	R.AVFPSIVGRPR.H
									90	K.DSYVGDEAQSKR.G
									89	K.QEYDEAGPSIVHR.K
									54	R.LDLAGRDLTDYLMK.I
									118	K.SYELPDGQVITIGNER.F
									100	R.VAPEEHPTLLTEAPLNPK.A
									51	K.DLYANNVLSGGTTMYPGIADR.M
82	45.3	4	actin, cytoplasmic 2	762	ACTB	gi|471367241	Trichechus manatus	42.1	52	R.GYSFTTTAER.E
									50	R.AVFPSIVGRPR.H
									81	K.DSYVGDEAQSKR.G
									84	K.QEYDESGPSIVHR.K
									56	R.LDLAGRDLTDYLMK.I
									115	K.SYELPDGQVITIGNER.F
									104	R.VAPEEHPVLLTEAPLNPK.A
									62	K.DLYANTVLSGGTTMYPGIADR.M
									53	R.TTGIVMDSGDGVTHTVPIYEGYALPHAILR.L
83	45.7	5.5	prelamin-A/C	135	LMNA	gi|556759719	Pantholops hodgsonii	74.4	PMF	PMF
84	40.8	5.5	actin, cytoplasmic 1-like	366	ACTB	gi|301762186	Ailuropoda melanoleuca	42.1	33	K.DSYVGDEAQSKR.G
									52	K.QEYDESGPSIVHR.K
									100	K.SYELPDGQVITIGNER.F
									76	R.VAPEEHPVLLTEAPLNPK.A
85	39.8	3.2	tropomyosin beta chain	266	TPM2	gi|466017096	Orcinus orca	33	50	R.IQLVEEELDRAQER.L
									24	K.HIAEDSDRKYEEVAR.K
86	24.8	4.1	casein beta	346	CSN2	gi|548470565	Capra hircus	24.9	47	K.HKEMPFPK.Y
									112	K.FQSEEQQQTEDELQDK.I
									88	K.YPVEPFTESQSLTLTDVEK.L
									74	R.DMPIQAFLLYQEPVLGPVR.G
87	22.8	3.9	kappa casein	186	CSN3	gi|117958733	Capra hircus	16.1	61	K.YIPIQYVLSR.Y
									49	K.SCQDQPTTLAR.H
									26	R.SPAQTLQWQVLPNTVPAK.S
88	32.2	3.5	annexin A5	801	ANXA5	gi|548468956	Capra hircus	36.2	54	K.VLTEIIASR.T
									66	R.LYDAYELK.H
									53	R.SEIDLYNIR.K
									64	R.SEIDLYNIRK.E
									69	K.NFGTSLYSMIK.G
									54	R.GTVTDFPGFDER.A
									140	K.GLGTDEESILTLLTSR.S
									26	R.MLVVLLQANRDPDAR.I
									42	R.GTVTDFPGFDERADAETLR.K
89	24.5	4.7	prohibitin isoform X1	1030	PHB	gi|548508758	Capra hircus	29.8	65	K.QVAQQEAER.A
									75	R.FDAGELITQR.E
									63	R.ILFRPVASQLPR.I
									88	R.IFTSIGEDYDER.V
									140	R.KLEAAEDIAYQLSR.SK.AAELIANSLATAGDGLIELR.K
									131	K.FGLALAVAGGVVNSALYNVDAGHR.A
									140	R.IFTSIGEDYDERVLPSITTEILK.S
									27	K.AAIISAEGDSKAAELIANSLATAGDGLIELR.K
90	15.7	4.2	apolipoprotein A-I, apoA-1	170	APOA1	gi|245563	Bos taurus	28.4	26	K.LSPLAQELR.D
									29	R.QQLAPYSDDLR.Q
									23	K.VQPYLDEFQKK.W
91	34.2	5.8	annexin A3	249	ANXA3	gi|426231916	Ovis aries	36.2	22	R.NTPAFLAER.L
									25	K.GAGTDEFTLNR.I
92	31.6	4.6	annexin A4	253	ANXA4	gi|426223396	Ovis aries	36.1	20	K.ASSGFNAAEDAQTLR.K
									85	K.GLGTDEDAIINVLAYR.S
93	28.4	3	alpha s1 casein	321	CSN1S1	gi|394997385	Capra hircus	24.2	67	R.YLGYLEQLLR.L
									45	K.YNVPQLEIVPK.S
									66	K.YIQKEDVPSER.Y
									91	K.HPINHQGLSPEVLNENLLR.F
94	42.9	5.2	Succinyl-CoA synthetase, betaG chain	99	SUCLG2	gi|146231894	Bos taurus	47	48	K.INFDDNAEFR.Q
									30	R.FFVADTASEALEAAKR.L
95	35.2	4.6	Guanine nucleotide-binding protein G(I)/G(S)/G(T) subunit beta-2	60	GNB2	gi|432101315	Myotis davidii	35.9	41	R.AGVLAGHDNR.V
			BN-PAGE
1	69.2	--	Chain A, BSA	804	ALB	gi|367460260	Bos taurus	68.4	64	K.LVNELTEFAK.T
									80	R.DTHKSEIAHR.F
									72	R.FKDLGEEHFK.G
									57	R.RHPEYAVSVLLR.L
									122	K.LGEYGFQNALIVR.Y
									122	K.DAFLGSFLYEYSR.R
									118	R.KVPQVSTPTLVEVSR.S
									82	R.RHPYFYAPELLYYANK.Y
2	68.9	--	Chain A, BSA	390	ALB	gi|367460260	Bos taurus	68.4	46	-.DTHKSEIAHR.F
									42	R.FKDLGEEHFK.G
									37	K.HLVDEPQNLIK.Q
									40	R.RHPEYAVSVLLR.L
									53	K.LGEYGFQNALIVR.Y
									63	K.DAFLGSFLYEYSR.R
									59	R.KVPQVSTPTLVEVSR.S
									28	R.RHPYFYAPELLYYANK.Y
3	65.3	--	calreticulin	336	CALR	gi|545920	Bos taurus	46.5	51	K.FYGDQEKDK.G
									59	K.KVHVIFNYK.G
									57	K.EQFLDGDGWTER.W
									103	K.FYGDQEKDKGLQTSQDAR.F
4	38	--	annexin A5	573	ANXA5	gi|548468956	Capra hircus	36.2	49	K.VLTEIIASR.T
									54	R.LYDAYELK.H
									52	R.SEIDLYNIR.K
									51	R.SEIDLYNIRK.E
									71	R.GTVTDFPGFDER.A
									104	K.GLGTDEESILTLLTSR.S
									24	R.MLVVLLQANRDPDAR.I
5	37.4	--	alpha S1 casein	422	CSN1S1	gi|311943	Capra hircus	24.2	74	R.YLGYLEQLLK.L
									60	K.YIQKEDVPSER.Y
									58	R.FVVAPFPEVFRK.E
									107	K.HPINHQGLSPEVPNENLLR.F
									89	K.QPMIAVNQELAYFYPQLFR.Q
6	31.3	--	alpha S1 casein	254	CSN1S1	gi|311943	Capra hircus	24.2	69	R.YLGYLEQLLK.L
									57	K.YNVPQLEIVPK.S
									46	K.YIQKEDVPSER.Y
									37	K.HPINHQGLSPEVPNENLLR.F
7	25.4	--	alpha-s2-casein	193	CSN1S2	gi|284025656	Ovis aries	26.5	73	R.NAGPFTPTVNR.E
									30	R.NANEEEYSIR.S
8	17.4	--	alpha S1 casein	183	CSN1S1	gi|311943	Capra hircus	24.2	37	R.YLGYLEQLLK.L
									41	K.YNVPQLEIVPK.S
									46	K.YIQKEDVPSER.Y
9	16.7	--	alpha s1 casein	159	CSN1S1	gi|394997385	Capra hircus	24.2	53	R.YLGYLEQLLR.L
									20	K.YNVPQLEIVPK.S
									47	K.YIQKEDVPSER.Y
10	19.5	--	alpha s1 casein	252	CSN1S1	gi|394997385	Capra hircus	24.2	75	R.YLGYLEQLLR.L
									35	K.YIQKEDVPSER.Y
									117	K.HPINHQGLSPEVLNENLLR.F
11	38.5	--	beta-casein precursor	131	CSN2	gi|57164377	Ovis aries	25	21	K.HKEMPFPK.Y
									39	K.YPVEPFTESQSLTLTDVEK.L
									53	R.DMPIQAFLLYQEPVLGPVR.G
12	44.6	--	annexin A2	99	ANXA2	gi|511955280	Mustela putorius	35.3	20	R.QDIAFAYQR.R
									63	K.GVDEVTIVNILTNR.S
13	38.7	--	alpha s2-casein	447	CSN1S2	gi|6179400	Capra hircus	26.6	50	K.FAWPQYLK.T
									71	R.NAGPFTPTVNR.E
									47	R.NANEEEYSIR.S
									45	K.ITVDDKHYQK.A
									80	K.ALNEINQFYQK.F
14	34.5	--	alpha-s2-casein	252	CSN1S2	gi|284025656	Ovis aries	26.5	36	K.FAWPQYLK.T
									75	R.NAGPFTPTVNR.E
									60	R.NANEEEYSIR.S
15	37.9	--	alpha-s2-casein	224	CSN1S2	gi|284025656	Ovis aries	26.5	32	K.FAWPQYLK.T
									60	R.NAGPFTPTVNR.E
									33	R.NANEEEYSIR.S
									51	K.ALNEINQFYQK.F
16	16.3	--	histone H2A type 1-E-like	178	HIST1H2AB	gi|545554691	Canis lupus familiaris	27.8	39	R.HLQLAIRNDEELNK.L
									77	R.VTIAQGGVLPNIQAVLLPK.K
									24	R.HLQLAIRNDEELNKLLGR.V
17	15.6	--	fatty acid-binding protein, heart-like	132	FABP3	gi|344287516	Loxodonta africana	14.8	63	K.LGVEFDETTADDR.K
18	18.4	--	translocon-associated protein subunit delta	264	SSR4	gi|555994776	Bos mutus	23.4	61	K.SAHAGTYEVR.F
									68	R.FFDEESYSLLR.K
									65	R.NNEDVSVIPPLFTVSVDHR.G
19	30.7	--	PREDICTED: B-cell receptor-associated protein 31	121	BCAP31	gi|426257404	Ovis aries	28	22	R.DSEEKVQEENR.S
									22	K.EYDRLLEEHTK.L
20	69.2	--	Chain A, BSA	909	ALB	gi|367460260	Bos taurus	68.4	80	K.LVNELTEFAK.T
									77	-.DTHKSEIAHR.F
									60	R.FKDLGEEHFK.G
									92	K.HLVDEPQNLIK.Q
									63	R.RHPEYAVSVLLR.L
									119	K.LGEYGFQNALIVR.Y
									114	K.DAFLGSFLYEYSR.R
									126	R.KVPQVSTPTLVEVSR.S
									62	R.RHPYFYAPELLYYANK.Y
21	59.8	--	hypothetical protein PANDA_003064	129	EEF1A1	gi|281348065	Ailuropoda melanoleuca	31.2	50	K.IGGIGTVPVGR.V
									43	K.THINIVVIGHVDSGK.S
22	55.1	--	Actin, cytoplasmic 1	258	ACTB	gi|60389477	Camelus dromedarius	42.2	46	R.AVFPSIVGRPR.H
									27	K.QEYDESGPSIVHR.K
									76	K.SYELPDGQVITIGNER.F
									44	R.VAPEEHPVLLTEAPLNPK.A
23	43.4	--	Annexin A2	126	ANXA2	gi|73586982	Bos taurus	38.8	PMF	PMF
24	47.4	--	tropomyosin beta chain isoform 1	80	TPM2	gi|395515226	Sarcophilus harrisii	32.9	PMF	PMF
25	82.1	--	78 kDa glucose-regulated protein	642	HSPA5	gi|426223038	Ovis aries	72.5	74	R.IINEPTAAAIAYGLDKR.E
									40	K.VTHAVVTVPAYFNDAQR.Q
									62	K.DNHLLGTFDLTGIPPAPR.G
									75	R.GVPQIEVTFEIDVNGILR.V
									145	R.IEIESFYEGEDFSETLTR.A
									45	K.VLEDSDLKKSDIDEIVLVGGSTR.I
26	91.4	--	lactotransferrin precursor	352	LTF	gi|550822103	Capra hircus	79.4	26	K.NLNREDFR.L
									53	K.YYGYTGAFR.C
									54	R.FQLFGSPEGR.R
									44	K.LRPVAAEIYGTEK.S
									38	K.SPQTHYYAVAVVK.K
									78	R.AAHVEQVLLHQQALFGK.N
27	84.5	--	lactotransferrin precursor	233	LTF	gi|550822103	Capra hircus	79.4	53	K.YYGYTGAFR.C
									58	R.FQLFGSPEGR.R
									39	K.LRPVAAEIYGTEK.S
28	94.5	--	endoplasmin	453	HSP90B1	gi|556779572	Pantholops hodgsonii	92.7	52	R.GLFDEYGSK.K
									59	K.FAFQAEVNR.M
									32	K.LGVIEDHSNR.T
									37	K.EAESSPFVER.L
									60	K.SILFVPTSAPR.G
									71	K.GVVDSDDLPLNVSR.E
									38	R.ELISNASDALDKIR.L
29	114.3	--	Chain A, BSA	510	ALB	gi|367460260	Bos taurus	68.4	77	-.DTHKSEIAHR.F
									39	R.RHPEYAVSVLLR.L
									54	K.HLVDEPQNLIK.Q
									105	K.LGEYGFQNALIVR.Y
									81	K.DAFLGSFLYEYSR.R
									78	R.KVPQVSTPTLVEVSR.S
30	102.7	--	Chain A, BSA	877	ALB	gi|367460260	Bos taurus	68.4	68	K.LVNELTEFAK.T
									82	-.DTHKSEIAHR.F
									71	R.FKDLGEEHFK.G
									108	K.HLVDEPQNLIK.Q
									61	R.RHPEYAVSVLLR.L
									114	K.LGEYGFQNALIVR.Y
									109	K.DAFLGSFLYEYSR.R
									121	R.KVPQVSTPTLVEVSR.S
									43	R.RHPYFYAPELLYYANK.Y
31	60.8	--	ATP synthase subunit beta, mitochondrial	194	ATP5B	gi|426224929	Ovis aries	56.2	34	K.AHGGYSVFAGVGER.T
									75	R.LVLEVAQHLGESTVR.T
32	57.5	--	Actin, cytoplasmic 1	206	ACTB	gi|60389477	Camelus dromedarius	42.2	43	R.AVFPSIVGRPR.H
									69	K.SYELPDGQVITIGNER.F
									37	R.VAPEEHPVLLTEAPLNPK.A
33	53.7	--	cytoskeletal beta actin	462	ACTB	gi|45269029	Sus scrofa	45.2	34	R.AVFPSIVGRPR.H
									54	K.QEYDESGPSIVHR.K
									33	K.DSYVGDEAQSKR.G
									67	K.SYELPDGQVITIGNER.F
									90	R.VAPEEHPVLLTEAPLNPK.A
									103	R.VAPEEHPVLLTEAPLNPK.A
34	70.6	--	Chain A, BSA	495	ALB	gi|367460260	Bos taurus	68.4	27	K.LVNELTEFAK.T
									55	K.HLVDEPQNLIK.Q
									78	K.LGEYGFQNALIVR.Y
									94	K.DAFLGSFLYEYSR.R
									59	R.KVPQVSTPTLVEVSR.S
35	93.4	--	endoplasmin	401	HSP90B1	gi|548466863	Capra hircus	92.2	45	R.GLFDEYGSK.K
									32	K.FAFQAEVNR.M
									32	K.LGVIEDHSNR.T
									34	K.EAESSPFVER.L
									58	K.SILFVPTSAPR.G
									59	K.GVVDSDDLPLNVSR.E
									36	R.ELISNASDALDKIR.L
36	72.7	--	dolichyl-diphosphooligosaccharide--protein glycosyltransferase subunit 1 precursor	83	RPN1	gi|47523726	Sus scrofa	68.8	29	R.SEDLLDYGPFR.D
									34	R.AASFLLALEPELEAR.L
37	72.5	--	dolichyl-diphosphooligosaccharide--protein glycosyltransferase subunit 1 precursor	88	RPN1	gi|47523726	Sus scrofa	68.8	21	R.SEDLLDYGPFR.D
									36	R.AASFLLALEPELEAR.L
38	62.6	--	leucine-rich repeat-containing protein 72	72	LRRC72	gi|554555895	Myotis brandtii	30.4	PMF	PMF
39	74.8	--	NADH-ubiquinone oxidoreductase 75 kDa subunit, mitochondrial isoform 1	113	NDUSF1	gi|478505189	Ceratotherium simum	80.5	29	K.VALIGSPVDLTYR.Y
40	58	--	ATP synthase subunit alpha, mitochondrial isoform X1	906	ATP5A1	gi|548519195	Capra hircus	59.7	48	R.VLSIGDGIAR.V
									72	K.AVDSLVPIGR.G
									41	K.GIRPAINVGLSVSR.V
									95	K.TSIAIDTIINQKR.F
									110	R.EAYPGDVFYLHSR.L
									93	R.ILGADTSVDLEETGR.V
									110	R.TGAIVDVPVGEELLGR.V
									61	K.FENAFLSHVISQHQTLLGK.I
									120	R.EVAAFAQFGSDLDAATQQLLSR.G
41	56.1	--	Chain D, Bovine F1-C8 Sub-Complex Of Atp Synthase	822	ATP5B	gi|306991567	Bos taurus	50.3	138	K.AHGGYSVFAGVGER.T
									96	R.FTQAGSEVSALLGR.I
									40	K.VALVYGQMNEPPGAR.A
									109	R.LVLEVAQHLGESTVR.T
									63	R.IMDPNIVGSEHYDVAR.G
									80	K.VLDSGAPIRIPVGPETLGR.I
									114	R.AIAELGIYPAVDPLDSTSR.I
									56	R.FLSQPFQVAEVFTGHLGK.L
42	53.6	--	ATP synthase subunit beta, mitochondrial	137	ATP5B	gi|426224929	Ovis aries	56.2	36	K.AHGGYSVFAGVGER.T
									23	R.LVLEVAQHLGESTVR.T
									44	R.AIAELGIYPAVDPLDSTSR.I
43	47.3	--	actin, alpha skeletal muscle	139	ACTA	gi|556775650	Pantholops hodgsonii	47.3	21	R.AVFPSIVGRPR.H
									65	K.SYELPDGQVITIGNER.F
44	50.2	--	beta-actin	226	ACTB	gi|118419975	Megaptera novaeangliae	40.9	22	R.GYSFTTTAER.E
									35	R.AVFPSIVGRPR.H
									34	K.DSYVGDEAQSKR.G
									86	K.SYELPDGQVITIGNER.F
45	51	--	cytochrome b-c1 complex subunit 2, mitochondrial	286	UQCRC2	gi|548520135	Capra hircus	48.3	48	K.QVAEQFLNIR.G
									75	R.LPNGLVIASLENYAPASR.I
									63	K.VTPDELHDYVQNHFTSAR.M
									41	K.AVAFQNPQAHVIENLHAAAYR.N
46	33.6	--	alpha S1 casein	176	CSN1S1	gi|311943	Capra hircus	24.2	43	R.YLGYLEQLLK.L
									39	K.YIQKEDVPSER.Y
									62	K.HPINHQGLSPEVPNENLLR.F
47	31.5	--	prohibitin isoform X1	237	PHB	gi|556738302	Pantholops hodgsonii	29.8	49	R.FDAGELITQR.E
									39	R.IFTSIGEDYDER.V
									88	R.KLEAAEDIAYQLSR.S
48	35.9	--	Chain G, Bovine Mitochondrial F1-Atpase Complexed With Aurovertin B	243	ATP5C	gi|1827815	Bos taurus	30.2	49	K.HLIIGVSSDR.G
									87	R.VYGVGSLALYEK.A
									44	R.THSDQFLVTFK.E
49	35.6	--	cytochrome c1, heme protein, mitochondrial-like	178	CYC1	gi|562868876	Tupaia chinensis	29.8	75	R.AANNGALPPDLSYIVR.A
									46	K.LSDYFPKPYPNPEAAR.A
50	25.1	--	Chain A, Subcomplex Of The Stator Of Bovine Mitochondrial Atp Synthase	111	ATP6	gi|110591026	Bos taurus	24.7	37	R.HYLFDVQR.N
									22	-.PVPPLPEHGGK.V
51	23.2	--	ATP synthase subunit O, mitochondrial isoform X2	295	ATP5O	gi|556722271	Pantholops hodgsonii	21.5	51	R.YATALYSAASK.Q
									61	K.LVRPPVQIYGIEGR.Y
									64	K.FSPLTSNLINLLAENGR.L
									54	K.EKFSPLTSNLINLLAENGR.L
52	15.5	--	histone H4-like	222	H4FL	gi|511919209	Mustela putorius	12	47	R.ISGLIYEETR.G
									84	R.DNIQGITKPAIR.R
53	60.5	--	glutamate dehydrogenase 1, mitochondrial-like	84	GLUD1	gi|548526368	Capra hircus	54.6	33	K.HGGTIPIVPTAEFQDR.I
	1) Protein experimental Mw/pI. 2) Significant identification scores obtained with the Mowse algorithm (P<0.05). 3) Accession number of the identified protein from the NCBI database. 4) Protein theoretical molecular mass. 5) Individual ion scores from the Mowse algorithm respecting the identification of peptide sequences. Values obtained correspond to a P<0.05. 6) Sequence of the fragmented peptid…
